# Supplementary material for: Hyaluronan-Based Nanohydrogels as Effective Carriers for Transdermal Delivery of Lipophilic Agents: Towards Transdermal Drug Administration in Neurological Disorders
Source: MDPI journal article supplement (doi:10.3390/nano7120427), 2017-12-04
Supplement: s1 [file s1]

# Hyaluronan-Based Nanohydrogels as Effective Carriers for Transdermal Delivery of Lipophilic Agents: Towards Transdermal Drug Administration in Neurological Disorders

Seong Uk Son<sup>1</sup>, Jae-woo Lim<sup>1,2</sup>, Taejoon Kang<sup>1,2</sup>, Juyeon Jung<sup>1,2\*</sup> and Eun-Kyung Lim<sup>1,2\*</sup>

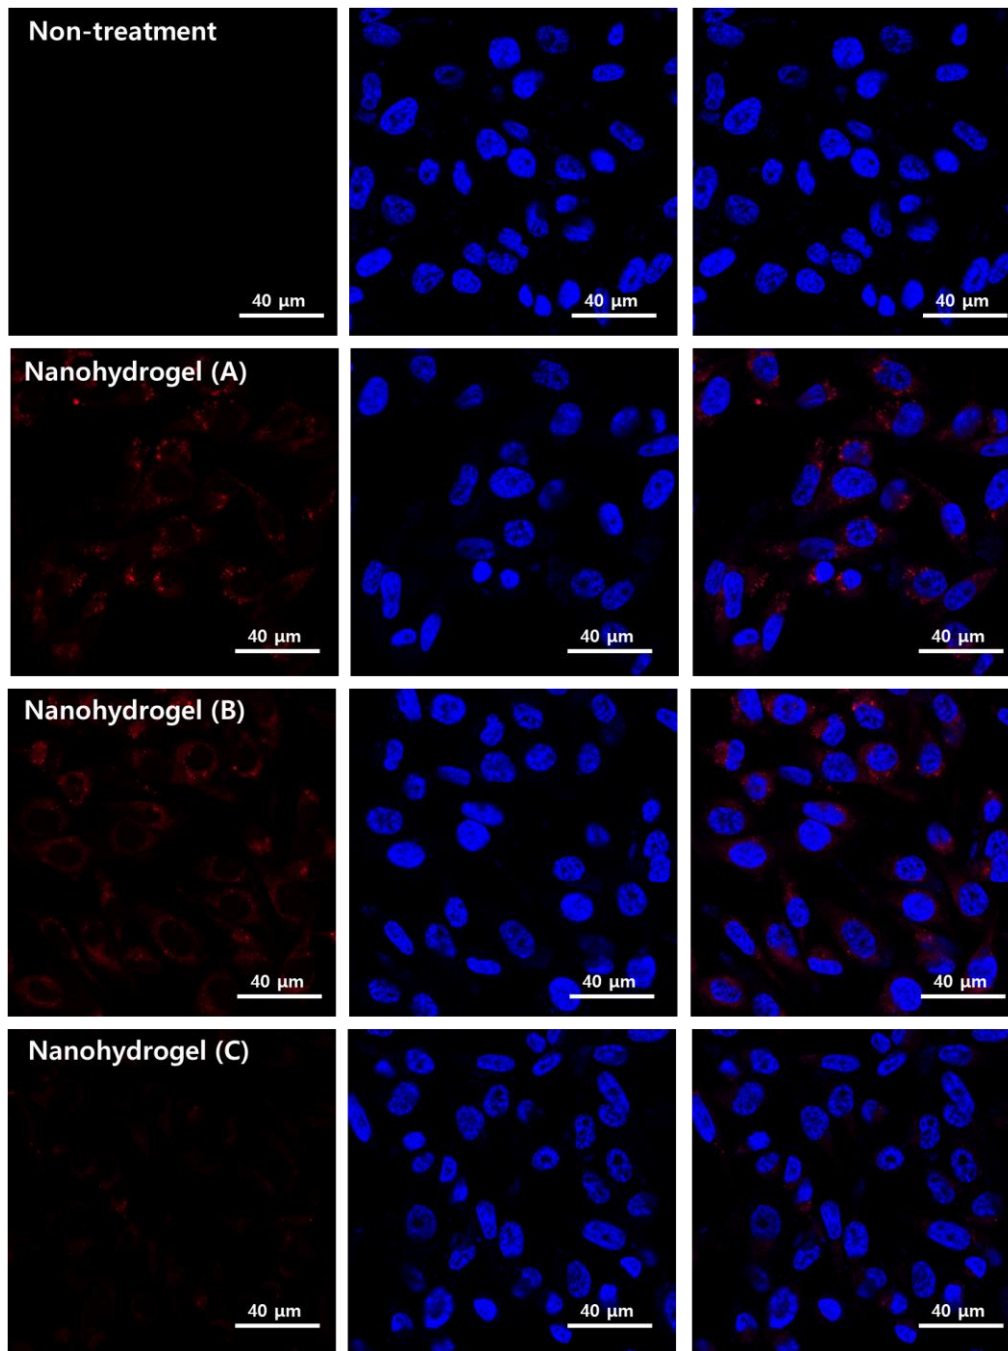

**Figure S1.** CLSM images of MDA-MB-231 cells incubated with Nanohydrogels for 13h (left lane: ICG, middle lane: Hoechst and right lane: Merged image).
